# Supplementary material for: RNA-Seq Revealed a Circular RNA-microRNA-mRNA Regulatory Network in Hantaan Virus Infection
Source: Front Cell Infect Microbiol. 2020 Mar 13;10:97. doi: 10.3389/fcimb.2020.00097 (PMC7083127; doi:10.3389/fcimb.2020.00097)
Supplement: Supplementary file 2 [file Table_2.XLS]

## Sheet: DE mRNAs
Table S2. Differential expression profiles of mRNAs
mRNA	RNA_type	Gene	log2FoldChange	p-Value	q-Value
NM_000070.2	mRNA	CAPN3	1.52612	0.00118413	0.0382302
NM_000161.2	mRNA	GCH1	2.49334	3.7296e-16	6.96491e-14
NM_000186.3	mRNA	CFH	1.11282	1.06341e-07	9.0988e-06
NM_000201.2	mRNA	ICAM1	2.15878	4.33578e-14	6.41895e-12
NM_000215.3	mRNA	JAK3	1.72872	8.77549e-05	0.00441778
NM_000222.2	mRNA	KIT	-1.17225	0.000527099	0.0201132
NM_000236.2	mRNA	LIPC	-4.53136	0.000919505	0.0316386
NM_000450.2	mRNA	SELE	2.81552	4.15393e-06	0.000273321
NM_000544.3	mRNA	TAP2	2.29305	2.77505e-18	5.62585e-16
NM_000584.3	mRNA	CXCL8	1.76755	5.19461e-06	0.000334941
NM_000593.5	mRNA	TAP1	3.41943	1.92304e-46	1.05547e-43
NM_000600.4	mRNA	IL6	1.06398	0.000465507	0.0180298
NM_000623.3	mRNA	BDKRB2	1.60315	0.000314001	0.0130609
NM_000636.3	mRNA	SOD2	1.17747	3.28966e-07	2.65331e-05
NM_000757.5	mRNA	CSF1	1.31638	3.05314e-10	3.14438e-08
NM_000758.3	mRNA	CSF2	3.54335	2.47342e-05	0.00145135
NM_000759.3	mRNA	CSF3	2.03711	0.000845716	0.0296898
NM_000959.3	mRNA	PTGFR	1.46417	0.000347343	0.0142114
NM_000963.3	mRNA	PTGS2	1.62633	1.51594e-15	2.77343e-13
NM_000969.3	mRNA	RPL5	-1.07819	2.26548e-09	2.20216e-07
NM_000971.3	mRNA	RPL7	-1.28295	6.63678e-12	7.9652e-10
NM_000983.3	mRNA	RPL22	-1.01358	1.20339e-07	1.02575e-05
NM_001000.3	mRNA	RPL39	-1.22126	4.24257e-05	0.00231725
NM_001002009.2	mRNA	NT5C3A	1.13195	6.5858e-07	5.07535e-05
NM_001002010.2	mRNA	NT5C3A	1.12149	8.35217e-07	6.26496e-05
NM_001002264.3	mRNA	EPSTI1	6.49108	2.35452e-38	1.06387e-35
NM_001003818.2	mRNA	TRIM6	1.77834	5.97034e-09	5.62136e-07
NM_001006.4	mRNA	RPS3A	-1.20363	6.11784e-11	6.6935e-09
NM_001006666.1	mRNA	APOBEC3F	1.01515	0.000467492	0.0180756
NM_001008530.2	mRNA	LGMN	1.58032	2.41169e-14	3.75573e-12
NM_001008539.3	mRNA	SLC7A2	1.43459	1.72555e-06	0.000121916
NM_001008844.2	mRNA	DSP	1.2552	0.000883856	0.0306463
NM_001009991.3	mRNA	SYTL3	1.31038	0.00025027	0.0107478
NM_001012333.2	mRNA	MDK	1.16769	7.04825e-11	7.68071e-09
NM_001012334.2	mRNA	MDK	1.18151	4.58475e-11	5.10745e-09
NM_001012967.2	mRNA	DDX60L	3.45419	4.39533e-24	1.19166e-21
NM_001012968.2	mRNA	SPIN4	-1.03091	0.00010371	0.00516322
NM_001013253.1	mRNA	LSP1	-5.09306	0.00027351	0.0115801
NM_001013254.1	mRNA	LSP1	-5.09306	0.000273338	0.0115801
NM_001013255.1	mRNA	LSP1	-5.09307	0.000273133	0.0115801
NM_001013746.2	mRNA	ZNF107	1.01544	2.12501e-06	0.000148047
NM_001014440.3	mRNA	ODF3B	2.34805	0.00146898	0.0458163
NM_001014975.2	mRNA	CFH	1.11646	2.69675e-08	2.38448e-06
NM_001018058.2	mRNA	TFEC	1.21594	0.00010414	0.0051789
NM_001024024.1	mRNA	GCH1	2.46791	5.52234e-14	8.01736e-12
NM_001024070.1	mRNA	GCH1	2.4928	2.32571e-14	3.65128e-12
NM_001024071.1	mRNA	GCH1	2.44304	2.7345e-13	3.75209e-11
NM_001024465.2	mRNA	SOD2	1.24725	2.32014e-07	1.91234e-05
NM_001024466.2	mRNA	SOD2	1.25357	2.1256e-07	1.76503e-05
NM_001024912.2	mRNA	CEACAM1	2.28867	7.15782e-07	5.48799e-05
NM_001025107.2	mRNA	ADAR	1.77722	1.22307e-21	3.05809e-19
NM_001030001.2	mRNA	RPS29	-1.20311	4.7063e-10	4.75981e-08
NM_001030287.3	mRNA	ATF3	1.83568	1.20044e-14	1.96462e-12
NM_001031683.3	mRNA	IFIT3	6.68736	7.39073e-58	5.54379e-55
NM_001032409.2	mRNA	OAS1	6.36255	2.37999e-29	7.65099e-27
NM_001032731.1	mRNA	OAS2	6.57795	4.38132e-25	1.24564e-22
NM_001037335.2	mRNA	HELZ2	4.13205	1.35005e-72	2.43041e-69
NM_001037663.1	mRNA	EEF1B2	-1.05793	1.7847e-08	1.60645e-06
NM_001038.5	mRNA	SCNN1A	3.49282	0.00114641	0.0372259
NM_001039477.2	mRNA	THEMIS2	2.44185	1.431e-13	2.00012e-11
NM_001039538.1	mRNA	MAP2	1.59306	2.48112e-18	5.0757e-16
NM_001039585.1	mRNA	PTGFR	1.46417	0.000347824	0.0142182
NM_001039660.1	mRNA	IL18BP	1.36416	0.000354119	0.0144361
NM_001040059.1	mRNA	CD68	2.00385	5.61033e-13	7.44833e-11
NM_001040443.2	mRNA	PHF11	2.67092	2.04681e-34	8.45126e-32
NM_001040444.2	mRNA	PHF11	2.65823	2.02314e-32	7.5878e-30
NM_001040619.2	mRNA	ATF3	1.87265	1.54395e-15	2.81323e-13
NM_001078.3	mRNA	VCAM1	2.47715	5.48271e-11	6.03313e-09
NM_001079843.2	mRNA	CASZ1	1.74396	0.000224078	0.00984849
NM_001080391.1	mRNA	SP100	1.90091	5.44099e-23	1.44898e-20
NM_001080431.2	mRNA	SLC45A4	1.2297	0.000946432	0.0323671
NM_001086521.1	mRNA	NDUFAF8	-1.31137	1.19057e-07	1.01675e-05
NM_001093772.1	mRNA	KIT	-1.16916	0.000537015	0.0204302
NM_001098478.1	mRNA	HLA-F	5.54179	2.00367e-16	3.7731e-14
NM_001098479.1	mRNA	HLA-F	5.14442	6.92996e-14	1.00286e-11
NM_001098540.2	mRNA	HPSE	1.34006	6.84561e-06	0.000434546
NM_001099783.1	mRNA	C4orf33	1.45394	1.33807e-08	1.20926e-06
NM_001100422.1	mRNA	SPATS2L	1.68819	1.83088e-19	4.07923e-17
NM_001100423.1	mRNA	SPATS2L	1.69813	6.38458e-20	1.4586e-17
NM_001100424.1	mRNA	SPATS2L	1.67655	5.18886e-19	1.10678e-16
NM_001100812.1	mRNA	CXCL16	1.51107	0.000357565	0.0145304
NM_001105528.1	mRNA	CCDC178	-2.60779	1.50075e-06	0.000107552
NM_001105533.1	mRNA	CPED1	1.84672	0.000205532	0.0091405
NM_001105556.2	mRNA	THEMIS2	2.44757	1.48979e-13	2.07584e-11
NM_001105565.2	mRNA	SMTNL1	3.42005	5.72673e-07	4.46685e-05
NM_001111.4	mRNA	ADAR	1.78156	1.01733e-21	2.57224e-19
NM_001113755.2	mRNA	TYMP	2.02919	4.94805e-10	4.99309e-08
NM_001113756.2	mRNA	TYMP	2.2644	2.38049e-12	2.97601e-10
NM_001114.4	mRNA	ADCY7	1.0044	6.27854e-05	0.00325169
NM_001122842.2	mRNA	NCOA7	1.6255	1.23609e-12	1.58494e-10
NM_001127184.2	mRNA	CFLAR	1.04068	6.44317e-09	6.02871e-07
NM_001127213.1	mRNA	LY6E	4.01997	4.07367e-56	2.91015e-53
NM_001127361.2	mRNA	RNF19B	1.17388	6.11689e-09	5.74732e-07
NM_001128933.2	mRNA	SYNPO2	1.88522	5.02302e-07	3.95912e-05
NM_001128934.2	mRNA	SYNPO2	1.91499	6.5576e-05	0.00338842
NM_001130016.2	mRNA	ART3	2.20585	1.95439e-05	0.00117592
NM_001130017.2	mRNA	ART3	2.18867	4.05267e-05	0.00223249
NM_001130046.1	mRNA	CCL20	3.14705	1.19404e-10	1.28255e-08
NM_001130079.2	mRNA	MOV10	1.65137	1.32286e-19	3.00691e-17
NM_001130140.2	mRNA	ERAP2	1.10237	3.0256e-09	2.89723e-07
NM_001130716.1	mRNA	PLAC8	1.58607	6.79589e-06	0.000432
NM_001134486.2	mRNA	GBP5	5.06065	1.15086e-18	2.39795e-16
NM_001135651.2	mRNA	EIF2AK2	2.5613	2.18147e-31	7.73063e-29
NM_001135652.2	mRNA	EIF2AK2	2.5535	1.73543e-31	6.29878e-29
NM_001136017.3	mRNA	CCND3	1.2377	7.0789e-11	7.69548e-09
NM_001136125.2	mRNA	CCND3	1.14782	1.57051e-09	1.53992e-07
NM_001136126.2	mRNA	CCND3	1.24429	1.40838e-10	1.50202e-08
NM_001136540.1	mRNA	APOL1	3.2841	7.75915e-31	2.64552e-28
NM_001136541.1	mRNA	APOL1	3.27714	4.38179e-31	1.51697e-28
NM_001142467.1	mRNA	HES4	1.81856	3.86659e-12	4.75463e-10
NM_001142497.2	mRNA	MLKL	2.24353	2.26449e-26	6.66117e-24
NM_001142523.1	mRNA	IRAK3	1.26307	3.76367e-06	0.0002491
NM_001143906.1	mRNA	TRAFD1	1.1266	6.63224e-10	6.63312e-08
NM_001143940.1	mRNA	LGSN	4.31595	0.000760013	0.0273422
NM_001144925.2	mRNA	MX1	7.43914	1.18587e-28	3.65557e-26
NM_001145008.1	mRNA	BTN3A1	1.97792	1.35922e-11	1.57663e-09
NM_001145009.1	mRNA	BTN3A1	2.01122	6.12456e-12	7.38986e-10
NM_001145057.1	mRNA	IL18BP	1.28532	0.000873658	0.0304236
NM_001145064.2	mRNA	GATSL2	-1.68723	1.25787e-14	2.05115e-12
NM_001145645.2	mRNA	TNFSF13B	4.10893	4.21799e-14	6.26518e-12
NM_001145903.2	mRNA	C2	3.64538	0.00126673	0.040434
NM_001146102.1	mRNA	PARP9	4.29491	1.86979e-40	9.14694e-38
NM_001146103.1	mRNA	PARP9	4.2949	1.71673e-40	8.49048e-38
NM_001146104.1	mRNA	PARP9	4.29675	4.52613e-40	2.19036e-37
NM_001146105.1	mRNA	PARP9	4.29663	4.62988e-40	2.21673e-37
NM_001146106.1	mRNA	PARP9	4.27391	4.47148e-37	1.97298e-34
NM_001159575.1	mRNA	SCNN1A	3.49282	0.00114546	0.037222
NM_001161354.1	mRNA	PLEKHA4	2.62313	8.91203e-14	1.27332e-11
NM_001161705.1	mRNA	BFSP1	-1.32316	9.47979e-07	7.01723e-05
NM_001163922.1	mRNA	VSIG10L	2.14283	2.77321e-05	0.00159605
NM_001164674.1	mRNA	SUMF1	-1.25036	3.63151e-06	0.000240706
NM_001164675.1	mRNA	SUMF1	-1.2577	3.22847e-06	0.000216221
NM_001164771.1	mRNA	SLC7A2	1.43948	1.56272e-06	0.000111109
NM_001165.4	mRNA	BIRC3	1.82815	3.95047e-08	3.46578e-06
NM_001165136.1	mRNA	HERC6	4.81425	7.97585e-51	4.98557e-48
NM_001166118.2	mRNA	NT5C3A	1.16948	4.56082e-07	3.60746e-05
NM_001166498.2	mRNA	HPSE	1.3625	4.6467e-06	0.000303526
NM_001166695.2	mRNA	SLC1A3	2.58077	0.00033599	0.0138349
NM_001168339.1	mRNA	TTC39B	1.08649	0.00104616	0.0348015
NM_001168340.1	mRNA	TTC39B	1.07146	0.000924433	0.0317597
NM_001168341.1	mRNA	TTC39B	1.08854	0.00101343	0.0340631
NM_001168342.1	mRNA	TTC39B	1.13634	0.000801305	0.0284637
NM_001170781.1	mRNA	FAM122C	1.23732	0.000251765	0.0107914
NM_001170794.1	mRNA	BACH2	-1.05669	0.00109054	0.0358779
NM_001172128.1	mRNA	IL16	-3.06635	0.000781565	0.0278946
NM_001172304.2	mRNA	MASTL	1.00029	7.49076e-07	5.64706e-05
NM_001172566.1	mRNA	MYD88	1.81497	2.59519e-17	4.94912e-15
NM_001172567.1	mRNA	MYD88	1.8217	1.16493e-18	2.41608e-16
NM_001172568.1	mRNA	MYD88	1.82408	1.14485e-18	2.39652e-16
NM_001172569.1	mRNA	MYD88	1.81037	2.22632e-17	4.26373e-15
NM_001178046.2	mRNA	MX1	7.44766	1.34741e-27	4.04278e-25
NM_001178147.1	mRNA	CSF3	2.00449	0.000965523	0.0327216
NM_001179.5	mRNA	ART3	2.18867	4.04737e-05	0.00223231
NM_001184813.1	mRNA	CEACAM1	2.19702	1.99685e-06	0.000139985
NM_001184815.1	mRNA	CEACAM1	2.20927	1.57097e-06	0.000111519
NM_001184816.1	mRNA	CEACAM1	2.19702	1.99485e-06	0.000139985
NM_001185015.1	mRNA	SP110	3.19397	3.05507e-24	8.43536e-22
NM_001190942.1	mRNA	TNFSF10	2.43826	4.17741e-10	4.24399e-08
NM_001190943.1	mRNA	TNFSF10	2.33862	1.37653e-10	1.47154e-08
NM_001193307.1	mRNA	SAMD9	3.93305	3.67866e-61	3.85028e-58
NM_001193495.1	mRNA	ADAR	1.77798	1.18535e-21	2.98034e-19
NM_001194999.1	mRNA	MR1	1.32221	2.10482e-05	0.00124808
NM_001195.4	mRNA	BFSP1	-1.31774	1.21603e-06	8.8701e-05
NM_001195000.1	mRNA	MR1	1.22061	0.000119556	0.00586135
NM_001195035.1	mRNA	MR1	1.06794	0.00114185	0.0371854
NM_001195536.1	mRNA	CHMP5	1.33459	6.2732e-12	7.54897e-10
NM_001197246.2	mRNA	BTN3A2	2.00484	9.5079e-14	1.35415e-11
NM_001197247.2	mRNA	BTN3A2	2.02224	5.89609e-13	7.80468e-11
NM_001197248.2	mRNA	BTN3A2	2.03477	2.75219e-13	3.75349e-11
NM_001197249.2	mRNA	BTN3A2	2.03892	2.80064e-13	3.80802e-11
NM_001198644.1	mRNA	TRIM6	1.91016	3.91423e-09	3.71653e-07
NM_001198645.1	mRNA	TRIM6	1.9039	1.88361e-08	1.69209e-06
NM_001199573.1	mRNA	TRIM22	2.17248	3.47066e-31	1.22032e-28
NM_001199619.1	mRNA	NCOA7	1.62834	1.37842e-12	1.75246e-10
NM_001199620.1	mRNA	NCOA7	1.62915	1.35344e-12	1.72558e-10
NM_001199621.1	mRNA	NCOA7	1.66268	1.77403e-13	2.44915e-11
NM_001199622.1	mRNA	NCOA7	2.26474	6.37152e-22	1.63861e-19
NM_001199739.1	mRNA	CTSS	1.62942	2.82591e-10	2.93048e-08
NM_001199830.1	mRNA	HPSE	1.37433	4.88558e-06	0.000317288
NM_001199834.1	mRNA	VCAM1	2.48546	1.21284e-11	1.4252e-09
NM_001201546.1	mRNA	SLC16A4	1.06363	0.000158419	0.00739605
NM_001201547.1	mRNA	SLC16A4	1.05837	0.000188229	0.00853116
NM_001201548.1	mRNA	SLC16A4	1.05449	0.000229827	0.0100053
NM_001204813.1	mRNA	NT5E	1.32073	5.79869e-12	7.03439e-10
NM_001205344.1	mRNA	CEACAM1	2.28867	7.14701e-07	5.48799e-05
NM_001206484.2	mRNA	ATF3	1.88179	2.08678e-15	3.7718e-13
NM_001206486.2	mRNA	ATF3	1.78484	1.60988e-13	2.23624e-11
NM_001206488.2	mRNA	ATF3	1.86706	2.75616e-15	4.96174e-13
NM_001206567.1	mRNA	IFI16	1.53385	9.14232e-16	1.69325e-13
NM_001206701.1	mRNA	SP100	1.82009	4.1258e-22	1.07333e-19
NM_001206702.1	mRNA	SP100	1.77206	1.97603e-21	4.83332e-19
NM_001206703.1	mRNA	SP100	1.76032	2.53755e-21	6.10721e-19
NM_001206704.1	mRNA	SP100	1.76615	1.80406e-21	4.46118e-19
NM_001206955.1	mRNA	CNTN4	-3.94796	0.00127922	0.0408028
NM_001206960.1	mRNA	PLA1A	3.77974	2.12474e-14	3.37901e-12
NM_001206961.1	mRNA	PLA1A	3.84462	2.98278e-13	4.04347e-11
NM_001207035.1	mRNA	ETV7	3.31119	8.39154e-07	6.28402e-05
NM_001207036.1	mRNA	ETV7	3.85738	1.166e-11	1.37374e-09
NM_001207037.1	mRNA	ETV7	3.91981	3.83528e-12	4.72906e-10
NM_001207038.1	mRNA	ETV7	4.09175	1.08149e-12	1.39067e-10
NM_001207039.1	mRNA	ETV7	3.19138	1.9017e-06	0.000134151
NM_001207040.1	mRNA	ETV7	4.05305	1.04698e-11	1.24328e-09
NM_001207041.1	mRNA	ETV7	3.99012	2.95803e-11	3.36185e-09
NM_001207063.1	mRNA	CXADR	-1.26283	3.73127e-05	0.00209127
NM_001207064.1	mRNA	CXADR	-1.23544	5.25392e-05	0.00277207
NM_001207065.1	mRNA	CXADR	-1.27885	3.9433e-05	0.00218562
NM_001223.4	mRNA	CASP1	2.01455	2.96114e-10	3.05663e-08
NM_001242384.1	mRNA	SYTL3	1.27884	0.000274517	0.0116008
NM_001242394.1	mRNA	SYTL3	1.33783	0.000103682	0.00516322
NM_001242395.1	mRNA	SYTL3	1.33682	0.000165053	0.00765302
NM_001242803.1	mRNA	BTN3A3	1.94266	1.30726e-17	2.54281e-15
NM_001242923.1	mRNA	EIF3L	-1.2184	1.39412e-11	1.61295e-09
NM_001243539.1	mRNA	IL15RA	1.75042	4.3572e-12	5.34008e-10
NM_001244583.1	mRNA	TFEC	1.22116	8.67081e-05	0.00437487
NM_001244706.1	mRNA	CSAD	-1.30281	0.00157889	0.0487854
NM_001251.2	mRNA	CD68	2.00329	4.79835e-13	6.42722e-11
NM_001256071.2	mRNA	RNF213	3.05824	1.59264e-40	7.96427e-38
NM_001256477.1	mRNA	CMPK2	7.96909	9.94974e-133	2.23899e-128
NM_001256478.1	mRNA	CMPK2	7.42502	7.94103e-104	3.24904e-100
NM_001256569.1	mRNA	PPFIBP2	-1.35305	0.000395462	0.0158056
NM_001256765.1	mRNA	IL15RA	1.74875	1.82427e-11	2.08913e-09
NM_001257118.2	mRNA	CASP1	2.06492	8.87917e-13	1.15496e-10
NM_001257119.2	mRNA	CASP1	2.06222	9.38863e-13	1.21771e-10
NM_001257988.1	mRNA	TYMP	2.05738	4.99073e-10	5.02489e-08
NM_001257989.1	mRNA	TYMP	2.04923	3.86234e-10	3.94169e-08
NM_001257999.2	mRNA	ANKFY1	1.28578	1.03674e-13	1.46268e-11
NM_001258017.1	mRNA	IL4I1	1.40213	3.19642e-06	0.000214394
NM_001258018.1	mRNA	IL4I1	1.42068	2.43117e-06	0.000166795
NM_001261825.1	mRNA	OASL	7.6752	6.66954e-106	3.75211e-102
NM_001267699.1	mRNA	RPS3A	-1.13679	3.68465e-10	3.7689e-08
NM_001270383.1	mRNA	ENKUR	2.50575	0.00105645	0.0350896
NM_001270507.1	mRNA	TNFAIP3	1.98205	4.31244e-21	1.0215e-18
NM_001270508.1	mRNA	TNFAIP3	1.9806	4.48188e-21	1.05608e-18
NM_001270550.1	mRNA	MDK	1.17632	6.12745e-11	6.6935e-09
NM_001270551.1	mRNA	MDK	1.17303	5.3323e-11	5.88199e-09
NM_001270552.1	mRNA	MDK	1.18766	4.87483e-11	5.40386e-09
NM_001270927.1	mRNA	IFIT1	7.69618	6.27208e-66	7.84114e-63
NM_001270928.1	mRNA	IFIT1	7.70323	3.44923e-66	4.59045e-63
NM_001270929.1	mRNA	IFIT1	7.70323	3.46787e-66	4.59045e-63
NM_001270930.1	mRNA	IFIT1	7.69722	6.15136e-66	7.84114e-63
NM_001271594.1	mRNA	SESN3	-1.22553	0.00011108	0.00549372
NM_001278233.1	mRNA	LMCD1	-1.05733	0.000336896	0.0138469
NM_001278352.1	mRNA	ACO1	-1.36572	8.7981e-14	1.2627e-11
NM_001278485.1	mRNA	ANAPC15	-1.11327	0.00155436	0.0481457
NM_001278486.1	mRNA	ANAPC15	-1.11327	0.00155349	0.0481457
NM_001278606.1	mRNA	BFSP1	-1.32316	9.47221e-07	7.01723e-05
NM_001278607.1	mRNA	BFSP1	-1.32316	9.47236e-07	7.01723e-05
NM_001278608.1	mRNA	BFSP1	-1.30806	1.30711e-06	9.48835e-05
NM_001278736.1	mRNA	CCL5	3.46509	2.73868e-34	1.11042e-31
NM_001281528.1	mRNA	PSME1	1.31144	4.03519e-11	4.51761e-09
NM_001281529.1	mRNA	PSME1	1.3046	5.26055e-11	5.8171e-09
NM_001282359.1	mRNA	ZNF107	1.01052	2.29811e-06	0.000158633
NM_001282399.1	mRNA	IL18R1	1.73913	0.000148162	0.00703394
NM_001282735.1	mRNA	SPATS2L	1.69107	1.67976e-19	3.76116e-17
NM_001282743.1	mRNA	SPATS2L	1.675	4.29004e-19	9.28258e-17
NM_001282744.1	mRNA	SPATS2L	1.68933	2.30999e-19	5.12135e-17
NM_001282859.1	mRNA	XRN1	1.05526	1.56063e-06	0.000111109
NM_001282920.1	mRNA	MX1	7.50927	1.50201e-29	4.89851e-27
NM_001285485.1	mRNA	NEURL3	5.24964	2.72609e-14	4.13099e-12
NM_001285486.1	mRNA	NEURL3	4.31453	5.2885e-08	4.61268e-06
NM_001286057.1	mRNA	ADCY7	1.23827	0.00063449	0.0235028
NM_001286072.1	mRNA	MOV10	1.64536	3.00324e-19	6.56136e-17
NM_001286113.1	mRNA	THEMIS2	2.48509	1.2963e-14	2.10618e-12
NM_001286115.1	mRNA	THEMIS2	2.50654	9.26922e-15	1.53937e-12
NM_001286352.1	mRNA	OLFML3	1.60545	0.000406277	0.0161101
NM_001286353.1	mRNA	OLFML3	1.60503	0.000342585	0.0140295
NM_001286673.1	mRNA	RGS20	1.23657	0.000281464	0.0118361
NM_001286674.1	mRNA	RGS20	1.18459	0.0007186	0.0260187
NM_001286675.1	mRNA	RGS20	1.27365	0.000229869	0.0100053
NM_001286754.1	mRNA	SYNPO2	1.96995	2.7006e-06	0.000183323
NM_001287427.1	mRNA	CCND3	1.14811	8.22664e-10	8.13733e-08
NM_001287434.1	mRNA	CCND3	1.24528	1.35955e-10	1.45685e-08
NM_001287529.1	mRNA	MFSD12	1.2494	6.12651e-06	0.000392219
NM_001288954.1	mRNA	IFI27	5.63421	6.72343e-59	5.50172e-56
NM_001288957.1	mRNA	IFI27	5.60034	3.55855e-61	3.85028e-58
NM_001288958.1	mRNA	IFI27	5.60849	6.1032e-60	5.49361e-57
NM_001288960.1	mRNA	IFI27	5.67458	9.53397e-62	1.07271e-58
NM_001288995.1	mRNA	IFI27	5.61275	3.86662e-59	3.34656e-56
NM_001289005.1	mRNA	LSP1	-3.80926	0.00157197	0.048624
NM_001289758.1	mRNA	IFIT3	6.59183	2.58256e-58	2.07555e-55
NM_001289759.1	mRNA	IFIT3	6.6853	8.63117e-58	6.3681e-55
NM_001289939.1	mRNA	SLC1A3	2.6048	0.000238287	0.010302
NM_001289940.1	mRNA	SLC1A3	2.60044	0.00029325	0.0122772
NM_001289984.1	mRNA	JADE2	1.82046	7.48237e-15	1.27076e-12
NM_001289985.1	mRNA	JADE2	1.7918	1.49366e-14	2.40945e-12
NM_001290043.1	mRNA	TAP2	2.29325	2.7727e-18	5.62585e-16
NM_001291274.1	mRNA	HSH2D	2.66979	3.81547e-05	0.00212952
NM_001291468.1	mRNA	CCL4L2	6.73232	7.46225e-07	5.635e-05
NM_001291469.1	mRNA	CCL4L2	6.73232	7.45194e-07	5.635e-05
NM_001291470.1	mRNA	CCL4L2	6.73232	7.44528e-07	5.635e-05
NM_001291471.1	mRNA	CCL4L2	6.73232	7.4354e-07	5.635e-05
NM_001291472.1	mRNA	CCL4L2	6.73232	7.42737e-07	5.635e-05
NM_001291473.1	mRNA	CCL4L2	6.73232	7.41922e-07	5.635e-05
NM_001291474.1	mRNA	CCL4L2	6.73231	7.40996e-07	5.635e-05
NM_001291475.1	mRNA	CCL4L2	6.73231	7.40167e-07	5.635e-05
NM_001291510.1	mRNA	DDX60L	3.45038	1.78447e-20	4.13978e-18
NM_001292022.1	mRNA	TAP1	3.47631	2.38732e-55	1.62793e-52
NM_001293225.1	mRNA	PLA1A	3.80121	8.80966e-14	1.2627e-11
NM_001293228.1	mRNA	MYCN	-1.70652	0.000150788	0.00713302
NM_001293233.1	mRNA	MYCN	-1.66416	0.000226482	0.00991543
NM_001293557.1	mRNA	NOD2	3.37415	1.96414e-05	0.00117864
NM_001300807.1	mRNA	BATF2	5.47599	6.4832e-79	1.32629e-75
NM_001300808.1	mRNA	BATF2	5.57733	1.11404e-79	2.63887e-76
NM_001300821.2	mRNA	EIF4B	-1.57369	1.31079e-17	2.54281e-15
NM_001300826.1	mRNA	RNF19B	1.18259	1.0699e-08	9.88747e-07
NM_001300897.1	mRNA	SCLT1	1.28814	5.21145e-05	0.00276031
NM_001300898.1	mRNA	SCLT1	1.08623	0.000687229	0.0251255
NM_001301410.1	mRNA	GANC	1.13025	1.29611e-05	0.000790419
NM_001301860.1	mRNA	LPIN3	1.77881	0.0013123	0.0416805
NM_001302123.1	mRNA	CXCL11	6.11805	1.60229e-108	1.20187e-104
NM_001302884.1	mRNA	TDRD7	2.34007	4.29215e-33	1.65105e-30
NM_001303233.1	mRNA	ISG20	4.96416	2.66063e-66	3.99147e-63
NM_001303234.1	mRNA	ISG20	4.91331	8.41618e-61	8.52468e-58
NM_001303235.1	mRNA	ISG20	4.64336	2.17863e-77	4.2631e-74
NM_001303236.1	mRNA	ISG20	4.93161	8.52354e-61	8.52468e-58
NM_001303237.1	mRNA	ISG20	5.01304	4.02671e-60	3.69849e-57
NM_001303496.1	mRNA	SAMD9L	3.7671	3.27891e-60	3.07439e-57
NM_001303497.1	mRNA	SAMD9L	3.76052	7.58226e-60	6.69112e-57
NM_001303498.1	mRNA	SAMD9L	3.74977	6.33417e-59	5.37878e-56
NM_001303500.1	mRNA	SAMD9L	3.75056	5.50968e-58	4.20286e-55
NM_001304392.1	mRNA	CX3CL1	3.74131	4.06557e-32	1.49979e-29
NM_001304783.1	mRNA	TLDC2	3.8715	3.43908e-66	4.59045e-63
NM_001305275.1	mRNA	AGRN	1.3788	3.44724e-10	3.53409e-08
NM_001308042.1	mRNA	CFLAR	1.0801	4.22705e-09	3.99669e-07
NM_001308043.1	mRNA	CFLAR	1.15032	2.24172e-10	2.36278e-08
NM_001308126.1	mRNA	CCDC178	-2.60779	1.49951e-06	0.000107552
NM_001308143.1	mRNA	JADE2	1.78417	1.65217e-14	2.64618e-12
NM_001308277.1	mRNA	C19orf66	2.1534	2.09557e-31	7.48518e-29
NM_001310213.1	mRNA	MR1	1.21345	0.000121708	0.00594101
NM_001313972.1	mRNA	TXNIP	1.30343	1.04843e-10	1.13155e-08
NM_001314052.1	mRNA	KLF4	2.06474	2.565e-09	2.47196e-07
NM_001316963.1	mRNA	BTC	3.81384	1.09413e-06	8.00689e-05
NM_001317895.1	mRNA	PARP10	3.60517	5.29176e-52	3.4023e-49
NM_001317911.1	mRNA	PPM1L	-1.14762	0.000153198	0.00723485
NM_001317912.1	mRNA	PPM1L	-1.15305	0.000147636	0.00702381
NM_001318095.1	mRNA	IL6	1.17425	0.000169459	0.00782221
NM_001318745.1	mRNA	SYTL3	1.18789	0.00158299	0.0488644
NM_001318787.1	mRNA	TLR2	2.65156	6.85395e-09	6.39977e-07
NM_001318789.1	mRNA	TLR2	2.56099	1.21963e-08	1.11115e-06
NM_001318790.1	mRNA	TLR2	2.56099	1.21636e-08	1.11042e-06
NM_001318791.1	mRNA	TLR2	2.56099	1.21439e-08	1.11042e-06
NM_001318793.1	mRNA	TLR2	2.56099	1.21087e-08	1.10991e-06
NM_001318795.1	mRNA	TLR2	2.54392	2.17048e-08	1.93052e-06
NM_001318796.1	mRNA	TLR2	2.54392	2.16652e-08	1.93052e-06
NM_001319034.1	mRNA	DSP	1.2459	0.000814935	0.0288568
NM_001319179.1	mRNA	GBP3	1.88041	6.39071e-25	1.79763e-22
NM_001319180.1	mRNA	GBP3	1.89069	4.06083e-25	1.16409e-22
NM_001319181.1	mRNA	GBP3	1.93826	2.62468e-21	6.28332e-19
NM_001319220.1	mRNA	SLC16A4	1.00153	0.000959053	0.0326252
NM_001320151.1	mRNA	OAS1	6.35241	3.57334e-30	1.17388e-27
NM_001320531.1	mRNA	SLC9C1	2.44116	0.00079303	0.0282143
NM_001320727.1	mRNA	SETDB2-PHF11	1.77306	2.10354e-18	4.32292e-16
NM_001320972.1	mRNA	BLZF1	1.01994	2.10563e-08	1.88028e-06
NM_001320973.1	mRNA	BLZF1	1.10438	1.52128e-09	1.49491e-07
NM_001321324.1	mRNA	MOV10	1.64736	2.61016e-19	5.75847e-17
NM_001321411.1	mRNA	ANGPTL6	2.15203	1.2188e-15	2.24262e-13
NM_001322814.1	mRNA	SOD2	1.17804	3.21951e-07	2.60139e-05
NM_001322815.1	mRNA	SOD2	1.17411	3.90454e-07	3.11574e-05
NM_001322816.1	mRNA	SOD2	1.50804	6.15523e-09	5.77129e-07
NM_001322819.1	mRNA	SOD2	1.16493	3.95618e-07	3.14579e-05
NM_001322820.1	mRNA	SOD2	1.1755	3.30629e-07	2.66195e-05
NM_001323956.1	mRNA	RBCK1	1.20331	3.56228e-11	4.01815e-09
NM_001323958.1	mRNA	RBCK1	1.19477	2.25018e-11	2.56384e-09
NM_001323960.1	mRNA	RBCK1	1.20112	1.28804e-11	1.50962e-09
NM_001329099.1	mRNA	KLRG1	-1.29052	0.000663359	0.0243373
NM_001329101.1	mRNA	KLRG1	-1.25246	0.000190571	0.00859654
NM_001329102.1	mRNA	KLRG1	-1.24326	0.000227856	0.00994656
NM_001329103.1	mRNA	KLRG1	-1.25271	0.000204286	0.00910117
NM_001329229.1	mRNA	ERAP2	1.10122	3.32378e-09	3.17601e-07
NM_001329233.1	mRNA	ERAP2	1.12337	8.22579e-10	8.13733e-08
NM_001329998.1	mRNA	TRANK1	2.7058	7.47769e-47	4.20676e-44
NM_001330063.1	mRNA	ANKFY1	1.28599	9.81934e-14	1.3941e-11
NM_001330163.1	mRNA	LGALS9	4.20449	3.08213e-54	2.07036e-51
NM_001330183.1	mRNA	SLFN5	1.63841	4.33886e-19	9.34329e-17
NM_001330216.1	mRNA	CNP	1.23458	2.48288e-10	2.59268e-08
NM_001330230.1	mRNA	IFI35	4.85375	1.11276e-104	5.56456e-101
NM_001330542.1	mRNA	HEXDC	1.36137	4.11546e-09	3.89937e-07
NM_001330543.1	mRNA	EPSTI1	6.4896	2.36384e-38	1.06387e-35
NM_001330552.1	mRNA	NLRC5	3.9591	1.10171e-20	2.56911e-18
NM_001330654.1	mRNA	EIF4B	-1.57567	1.21412e-17	2.38615e-15
NM_001331228.1	mRNA	EPSTI1	6.49733	1.31854e-39	6.24655e-37
NM_001338.4	mRNA	CXADR	-1.26206	3.93991e-05	0.00218562
NM_001345927.1	mRNA	DDX60L	3.45387	4.03611e-24	1.1009e-21
NM_001346850.1	mRNA	C1S	4.42783	2.38481e-09	2.30324e-07
NM_001347004.1	mRNA	TMEM62	1.5091	7.93752e-15	1.34126e-12
NM_001347005.1	mRNA	TMEM62	1.4959	2.35776e-14	3.68449e-12
NM_001347006.1	mRNA	TMEM62	1.50462	5.94514e-15	1.04928e-12
NM_001347007.1	mRNA	TMEM62	1.49642	2.32839e-14	3.65128e-12
NM_001347008.1	mRNA	TMEM62	1.51459	4.56084e-14	6.70801e-12
NM_001347009.1	mRNA	TMEM62	1.52238	9.15165e-15	1.52548e-12
NM_001347010.1	mRNA	TMEM62	1.51638	6.48857e-15	1.13188e-12
NM_001347011.1	mRNA	TMEM62	1.50882	2.57559e-14	3.92567e-12
NM_001347012.1	mRNA	TMEM62	1.50933	2.50636e-14	3.88969e-12
NM_001347013.1	mRNA	TMEM62	1.51687	6.41671e-15	1.1237e-12
NM_001347014.1	mRNA	TMEM62	1.51097	4.81468e-14	7.0126e-12
NM_001347015.1	mRNA	TMEM62	1.51378	6.53737e-15	1.13599e-12
NM_001347016.1	mRNA	TMEM62	1.5054	2.2956e-14	3.62512e-12
NM_001347017.1	mRNA	TMEM62	1.51883	2.56048e-14	3.92567e-12
NM_001347018.1	mRNA	TMEM62	1.526	6.87947e-15	1.18175e-12
NM_001347019.1	mRNA	TMEM62	1.51729	1.00953e-13	1.42877e-11
NM_001347020.1	mRNA	TMEM62	1.51881	7.95707e-15	1.34126e-12
NM_001347021.1	mRNA	TMEM62	1.51146	3.17083e-14	4.76657e-12
NM_001347023.1	mRNA	TMEM62	1.51091	3.17729e-14	4.76657e-12
NM_001347024.1	mRNA	TMEM62	1.53684	2.52559e-14	3.89415e-12
NM_001347025.1	mRNA	TMEM62	1.52928	1.65087e-13	2.28613e-11
NM_001347026.1	mRNA	TMEM62	1.52912	9.98739e-15	1.64048e-12
NM_001347027.1	mRNA	TMEM62	1.52167	4.73052e-14	6.91239e-12
NM_001347028.1	mRNA	TMEM62	1.52964	9.90969e-15	1.63368e-12
NM_001347029.1	mRNA	TMEM62	1.52224	4.69033e-14	6.87599e-12
NM_001347030.1	mRNA	TMEM62	1.52062	7.76728e-13	1.01326e-10
NM_001347031.1	mRNA	TMEM62	1.52174	2.97294e-14	4.48993e-12
NM_001347032.1	mRNA	TMEM62	1.51329	6.6116e-15	1.14447e-12
NM_001347033.1	mRNA	TMEM62	1.51138	2.58188e-14	3.92567e-12
NM_001347034.1	mRNA	TMEM62	1.50729	3.86574e-14	5.78012e-12
NM_001348090.1	mRNA	LINC00176	-1.22051	2.24144e-05	0.0013256
NM_001402.5	mRNA	EEF1A1	-1.26269	2.06561e-10	2.18741e-08
NM_001404.4	mRNA	EEF1G	-1.08141	2.592e-08	2.29637e-06
NM_001417.6	mRNA	EIF4B	-1.57388	1.29881e-17	2.54148e-15
NM_001511.3	mRNA	CXCL1	1.52982	8.40614e-05	0.00424609
NM_001531.2	mRNA	MR1	1.22297	0.000100845	0.00503731
NM_001547.4	mRNA	IFIT2	5.80469	8.65362e-63	1.05261e-59
NM_001548.4	mRNA	IFIT1	7.70075	1.5793e-66	2.45096e-63
NM_001549.5	mRNA	IFIT3	6.59231	3.08291e-58	2.4342e-55
NM_001565.3	mRNA	CXCL10	7.17348	4.53353e-82	1.27522e-78
NM_001572.3	mRNA	IRF7	4.19549	2.19696e-69	3.53129e-66
NM_001674.3	mRNA	ATF3	1.87532	1.22082e-15	2.24262e-13
NM_001710.5	mRNA	CFB	4.23086	9.98922e-25	2.79239e-22
NM_001712.4	mRNA	CEACAM1	2.28867	7.13572e-07	5.48799e-05
NM_001729.3	mRNA	BTC	3.82646	1.08994e-06	7.98919e-05
NM_001733.4	mRNA	C1R	3.17315	1.23583e-07	1.05141e-05
NM_001734.4	mRNA	C1S	4.53662	1.16553e-09	1.14783e-07
NM_001760.4	mRNA	CCND3	1.14739	7.91532e-10	7.86394e-08
NM_001777.3	mRNA	CD47	1.08473	2.56933e-06	0.000175205
NM_001953.4	mRNA	TYMP	2.02685	4.19675e-10	4.25403e-08
NM_001959.3	mRNA	EEF1B2	-1.05338	2.09016e-08	1.87018e-06
NM_001961.3	mRNA	EEF2	-1.07202	6.53802e-08	5.65866e-06
NM_001964.2	mRNA	EGR1	1.60988	1.80112e-05	0.00108516
NM_002038.3	mRNA	IFI6	6.8644	3.02768e-85	9.73313e-82
NM_002053.2	mRNA	GBP1	3.44854	4.65989e-56	3.27692e-53
NM_002089.3	mRNA	CXCL2	1.73181	5.86329e-05	0.00305067
NM_002090.2	mRNA	CXCL3	1.71117	6.81228e-05	0.00349593
NM_002116.7	mRNA	HLA-A	1.91648	1.11261e-22	2.9283e-20
NM_002117.5	mRNA	HLA-C	3.28175	4.51863e-36	1.93681e-33
NM_002120.3	mRNA	HLA-DOB	2.4858	3.22098e-08	2.84168e-06
NM_002164.5	mRNA	IDO1	5.18233	1.18242e-33	4.62748e-31
NM_002176.3	mRNA	IFNB1	9.26288	2.24661e-35	9.53876e-33
NM_002178.2	mRNA	IGFBP6	1.57479	1.48084e-05	0.000899413
NM_002185.3	mRNA	IL7R	1.52907	1.33236e-11	1.54946e-09
NM_002189.3	mRNA	IL15RA	1.75814	7.88666e-12	9.44008e-10
NM_002197.2	mRNA	ACO1	-1.36669	8.64905e-14	1.24763e-11
NM_002198.2	mRNA	IRF1	1.75085	7.24025e-15	1.2343e-12
NM_002201.5	mRNA	ISG20	4.98328	9.30122e-63	1.10161e-59
NM_002208.4	mRNA	ITGAE	-1.38011	0.000483166	0.0185699
NM_002308.3	mRNA	LGALS9	4.10126	7.25502e-50	4.47287e-47
NM_002339.2	mRNA	LSP1	-5.2256	0.000186844	0.00848545
NM_002346.2	mRNA	LY6E	4.02706	2.50271e-56	1.81672e-53
NM_002374.3	mRNA	MAP2	1.64585	5.262e-18	1.05724e-15
NM_002391.4	mRNA	MDK	1.16049	9.63122e-11	1.04198e-08
NM_002416.2	mRNA	CXCL9	3.05086	0.000601815	0.0224774
NM_002448.3	mRNA	MSX1	1.27073	0.000186744	0.00848545
NM_002462.4	mRNA	MX1	7.45409	2.30015e-28	7.04221e-26
NM_002463.1	mRNA	MX2	9.49627	4.90467e-79	1.05114e-75
NM_002468.4	mRNA	MYD88	1.81933	1.26569e-18	2.61301e-16
NM_002526.3	mRNA	NT5E	1.32196	4.36641e-12	5.34008e-10
NM_002534.3	mRNA	OAS1	6.34313	2.17594e-29	7.04535e-27
NM_002535.2	mRNA	OAS2	7.41133	5.78628e-80	1.44676e-76
NM_002664.2	mRNA	PLEK	-3.98357	1.52284e-05	0.000923675
NM_002675.3	mRNA	PML	1.60453	6.84873e-15	1.18097e-12
NM_002759.3	mRNA	EIF2AK2	2.55763	5.98575e-31	2.05645e-28
NM_002800.4	mRNA	PSMB9	4.14578	1.1072e-08	1.01903e-06
NM_002801.3	mRNA	PSMB10	1.05908	2.02956e-05	0.00121143
NM_002818.2	mRNA	PSME2	1.37449	4.58529e-09	4.32632e-07
NM_002839.3	mRNA	PTPRD	-1.03038	0.000274304	0.0116008
NM_002970.3	mRNA	SAT1	1.53321	3.0787e-11	3.49017e-09
NM_002985.2	mRNA	CCL5	3.46509	2.73193e-34	1.11042e-31
NM_002994.4	mRNA	CXCL5	2.93956	1.82259e-07	1.53322e-05
NM_002996.4	mRNA	CX3CL1	3.74554	1.78334e-30	5.90154e-28
NM_003004.2	mRNA	SECTM1	5.92952	5.66813e-27	1.67829e-24
NM_003046.5	mRNA	SLC7A2	1.4433	1.58662e-06	0.000112453
NM_003113.3	mRNA	SP100	1.81889	3.87643e-22	1.01432e-19
NM_003141.3	mRNA	TRIM21	2.89294	1.06214e-45	5.62386e-43
NM_003190.4	mRNA	TAPBP	1.31164	1.31399e-12	1.68004e-10
NM_003264.4	mRNA	TLR2	2.56099	1.20983e-08	1.10991e-06
NM_003265.2	mRNA	TLR3	3.71405	1.03193e-23	2.78102e-21
NM_003335.2	mRNA	UBA7	2.38142	1.05658e-17	2.08563e-15
NM_003395.2	mRNA	WNT9A	-3.74704	1.92457e-07	1.616e-05
NM_003544.2	mRNA	HIST1H4B	-1.12968	3.63374e-09	3.46483e-07
NM_003545.3	mRNA	HIST1H4E	-1.48931	1.01171e-12	1.30468e-10
NM_003546.2	mRNA	HIST1H4L	-1.18481	6.89794e-10	6.86833e-08
NM_003641.3	mRNA	IFITM1	6.48483	1.68624e-33	6.54231e-31
NM_003661.3	mRNA	APOL1	3.28268	8.47327e-31	2.86728e-28
NM_003666.3	mRNA	BLZF1	1.15412	7.91627e-11	8.58505e-09
NM_003702.4	mRNA	RGS20	1.27545	0.000216298	0.00956561
NM_003733.3	mRNA	OASL	7.64099	7.93886e-112	8.93241e-108
NM_003754.2	mRNA	EIF3F	-1.03988	7.27443e-09	6.77832e-07
NM_003764.3	mRNA	STX11	1.00218	0.000142474	0.00685797
NM_003810.3	mRNA	TNFSF10	2.43885	3.87274e-10	3.94336e-08
NM_003827.3	mRNA	NAPA	1.03312	7.57502e-05	0.00386532
NM_003840.4	mRNA	TNFRSF10D	-2.72248	1.34147e-13	1.88082e-11
NM_003855.3	mRNA	IL18R1	1.76061	0.00012115	0.00592659
NM_003956.3	mRNA	CH25H	3.1044	3.09419e-06	0.000208781
NM_004029.2	mRNA	IRF7	4.16892	3.75327e-70	6.49691e-67
NM_004031.2	mRNA	IRF7	4.15119	1.65644e-69	2.7611e-66
NM_004048.2	mRNA	B2M	2.29795	4.09889e-26	1.19016e-23
NM_004079.4	mRNA	CTSS	1.65262	2.14302e-10	2.26405e-08
NM_004120.4	mRNA	GBP2	1.01856	3.87808e-08	3.40893e-06
NM_004159.4	mRNA	PSMB8	2.37068	9.5033e-15	1.57245e-12
NM_004172.4	mRNA	SLC1A3	2.64783	0.000183072	0.00838686
NM_004223.4	mRNA	UBE2L6	3.58591	1.88667e-34	7.86217e-32
NM_004235.5	mRNA	KLF4	1.97959	2.26902e-08	2.01419e-06
NM_004286.4	mRNA	GTPBP1	1.29925	3.27618e-13	4.42786e-11
NM_004297.3	mRNA	GNA14	1.0716	0.000829347	0.0292337
NM_004335.3	mRNA	BST2	3.54471	3.58613e-47	2.043e-44
NM_004392.6	mRNA	DACH1	-1.25524	1.97078e-06	0.000138589
NM_004415.3	mRNA	DSP	1.24933	0.000728541	0.0263575
NM_004509.3	mRNA	SP110	3.40358	2.7517e-26	8.04176e-24
NM_004510.3	mRNA	SP110	3.21082	3.09689e-24	8.49869e-22
NM_004513.5	mRNA	IL16	-2.8731	0.00142994	0.0448472
NM_004585.4	mRNA	RARRES3	3.44521	9.74855e-13	1.26076e-10
NM_004591.2	mRNA	CCL20	3.14705	1.19162e-10	1.28255e-08
NM_004673.3	mRNA	ANGPTL1	2.35637	5.84815e-12	7.07532e-10
NM_004688.2	mRNA	NMI	2.84134	5.41348e-37	2.36543e-34
NM_004696.2	mRNA	SLC16A4	1.04169	0.00025236	0.0108066
NM_004848.3	mRNA	THEMIS2	2.42777	3.72668e-13	5.02165e-11
NM_005082.4	mRNA	TRIM25	1.78012	2.92298e-19	6.41716e-17
NM_005089.3	mRNA	ZRSR2	1.0285	0.00143849	0.0450841
NM_005092.3	mRNA	TNFSF18	1.24366	0.000479794	0.0184561
NM_005101.3	mRNA	ISG15	5.75897	2.55005e-129	3.82559e-125
NM_005185.3	mRNA	CALML3	-6.61631	0.00070832	0.0257293
NM_005318.3	mRNA	H1F0	1.62545	9.20395e-19	1.94476e-16
NM_005378.5	mRNA	MYCN	-1.66416	0.000226356	0.00991543
NM_005409.4	mRNA	CXCL11	6.11874	1.53111e-108	1.20187e-104
NM_005419.3	mRNA	STAT2	2.72825	3.301e-47	1.92941e-44
NM_005514.7	mRNA	HLA-B	3.96624	5.01744e-18	1.01262e-15
NM_005516.5	mRNA	HLA-E	1.04406	1.22445e-06	8.91709e-05
NM_005531.2	mRNA	IFI16	1.546	4.29235e-16	7.98271e-14
NM_005532.4	mRNA	IFI27	5.6328	6.58114e-59	5.48502e-56
NM_005533.4	mRNA	IFI35	4.8467	3.34428e-104	1.50513e-100
NM_005567.3	mRNA	LGALS3BP	5.22428	6.71101e-48	3.97415e-45
NM_005606.6	mRNA	LGMN	1.58154	2.52654e-14	3.89415e-12
NM_005623.2	mRNA	CCL8	7.23651	4.01516e-07	3.18706e-05
NM_005810.3	mRNA	KLRG1	-1.28672	0.00014473	0.00693687
NM_006074.4	mRNA	TRIM22	2.17264	3.76386e-31	1.31315e-28
NM_006084.4	mRNA	IRF9	1.86583	1.45216e-19	3.28422e-17
NM_006187.3	mRNA	OAS3	5.92922	5.53084e-29	1.72862e-26
NM_006263.3	mRNA	PSME1	1.31464	3.73828e-11	4.20613e-09
NM_006290.3	mRNA	TNFAIP3	1.98289	3.83644e-21	9.13559e-19
NM_006291.2	mRNA	TNFAIP2	1.28793	1.13395e-11	1.33949e-09
NM_006332.4	mRNA	IFI30	4.05869	6.76268e-34	2.69346e-31
NM_006355.4	mRNA	TRIM38	1.30568	1.85567e-12	2.33286e-10
NM_006398.3	mRNA	UBD	2.36868	3.48308e-06	0.00023155
NM_006417.4	mRNA	IFI44	5.05872	4.28454e-58	3.32465e-55
NM_006462.5	mRNA	RBCK1	1.19044	3.16148e-11	3.57502e-09
NM_006472.5	mRNA	TXNIP	1.32861	5.68348e-11	6.2388e-09
NM_006573.4	mRNA	TNFSF13B	3.97297	1.55804e-12	1.96417e-10
NM_006665.5	mRNA	HPSE	1.36394	4.80544e-06	0.00031344
NM_006700.2	mRNA	TRAFD1	1.12563	6.73727e-10	6.72323e-08
NM_006820.3	mRNA	IFI44L	6.71868	7.68041e-23	2.03332e-20
NM_006871.3	mRNA	RIPK3	1.64135	0.000889737	0.0307554
NM_006877.3	mRNA	GMPR	1.76027	5.12232e-19	1.09779e-16
NM_006931.2	mRNA	SLC2A3	1.06403	6.18485e-10	6.19945e-08
NM_006946.2	mRNA	SPTBN2	-1.07479	7.17912e-06	0.000454435
NM_006994.4	mRNA	BTN3A3	1.87137	1.91628e-17	3.68564e-15
NM_007047.4	mRNA	BTN3A2	2.02455	5.52698e-13	7.35938e-11
NM_007048.5	mRNA	BTN3A1	1.99328	1.29983e-11	1.51613e-09
NM_007199.2	mRNA	IRAK3	1.23513	5.31925e-06	0.000342487
NM_007248.3	mRNA	TREX1	1.81987	9.74903e-12	1.16075e-09
NM_007274.3	mRNA	ACOT7	1.24756	5.65401e-05	0.00295545
NM_007315.3	mRNA	STAT1	2.74281	4.01067e-36	1.73562e-33
NM_007346.3	mRNA	OGFR	1.47765	1.62479e-11	1.875e-09
NM_009587.2	mRNA	LGALS9	4.09956	1.62794e-49	9.76892e-47
NM_012118.3	mRNA	NOCT	1.0777	0.000113505	0.00560131
NM_012252.3	mRNA	TFEC	1.2174	0.000101237	0.0050513
NM_012420.2	mRNA	IFIT5	3.4797	2.95453e-60	2.82918e-57
NM_014290.2	mRNA	TDRD7	2.34867	3.33941e-34	1.34191e-31
NM_014314.3	mRNA	DDX58	3.95709	4.1592e-74	7.79954e-71
NM_014349.2	mRNA	APOL3	2.06412	2.74836e-13	3.75349e-11
NM_014398.3	mRNA	LAMP3	1.87153	2.46868e-16	4.6294e-14
NM_014469.4	mRNA	RBMXL2	-3.00027	0.000564833	0.0213262
NM_014470.3	mRNA	RND1	1.71621	0.000195434	0.00877816
NM_014788.3	mRNA	TRIM14	3.8222	7.13813e-29	2.21558e-26
NM_014831.2	mRNA	TRANK1	2.70191	1.02681e-46	5.70527e-44
NM_015050.2	mRNA	CMTR1	1.67349	1.948e-20	4.49598e-18
NM_015288.5	mRNA	JADE2	1.7976	1.52941e-14	2.45831e-12
NM_015295.2	mRNA	SMCHD1	1.16181	6.37667e-08	5.52964e-06
NM_015474.3	mRNA	SAMHD1	3.84071	7.30455e-54	4.83454e-51
NM_015535.2	mRNA	SPATS2L	1.6907	1.59802e-19	3.59601e-17
NM_015840.3	mRNA	ADAR	1.78134	1.01696e-21	2.57224e-19
NM_015841.3	mRNA	ADAR	1.77404	1.60361e-21	3.9874e-19
NM_015900.3	mRNA	PLA1A	3.86694	1.3139e-14	2.12711e-12
NM_015907.2	mRNA	LAP3	2.21899	1.26697e-27	3.82694e-25
NM_016091.3	mRNA	EIF3L	-1.21857	1.66506e-11	1.91657e-09
NM_016135.3	mRNA	ETV7	3.91981	3.82161e-12	4.72514e-10
NM_016220.4	mRNA	ZNF107	1.01023	2.24323e-06	0.00015556
NM_016234.3	mRNA	ACSL5	2.20222	7.94522e-09	7.37283e-07
NM_016323.3	mRNA	HERC5	5.30607	2.4353e-52	1.58845e-49
NM_016376.4	mRNA	ANKFY1	1.28272	1.07745e-13	1.51536e-11
NM_016381.5	mRNA	TREX1	1.78947	2.21719e-14	3.51362e-12
NM_016410.5	mRNA	CHMP5	1.31156	1.77308e-11	2.03569e-09
NM_016489.12	mRNA	NT5C3A	1.17375	3.95425e-07	3.14579e-05
NM_016548.3	mRNA	GOLM1	1.265	2.47793e-12	3.08924e-10
NM_016571.2	mRNA	LGSN	4.31595	0.000759566	0.0273422
NM_016580.3	mRNA	PCDH12	-1.21756	0.000127727	0.00620116
NM_016582.2	mRNA	SLC15A3	2.23168	3.81197e-23	1.0212e-20
NM_016584.2	mRNA	IL23A	3.59179	8.74666e-07	6.51742e-05
NM_016591.2	mRNA	GCNT4	2.45579	6.71434e-06	0.00042742
NM_016619.2	mRNA	PLAC8	1.5995	4.63432e-06	0.000303157
NM_016816.3	mRNA	OAS1	6.36052	4.80836e-29	1.52398e-26
NM_016817.2	mRNA	OAS2	7.22489	8.30983e-62	9.58954e-59
NM_017414.3	mRNA	USP18	4.23001	1.13039e-83	3.39161e-80
NM_017523.3	mRNA	XAF1	4.25667	5.38253e-42	2.7528e-39
NM_017554.2	mRNA	PARP14	3.11381	2.98604e-32	1.11066e-29
NM_017631.5	mRNA	DDX60	3.69768	3.48671e-29	1.11293e-26
NM_017633.2	mRNA	FAM46A	2.92546	7.94097e-34	3.13501e-31
NM_017654.3	mRNA	SAMD9	3.93323	3.65758e-61	3.85028e-58
NM_017742.5	mRNA	ZCCHC2	1.18147	2.45865e-10	2.57335e-08
NM_017766.4	mRNA	CASZ1	1.86122	0.000146435	0.00698143
NM_017912.3	mRNA	HERC6	4.81573	9.46175e-50	5.75453e-47
NM_017947.2	mRNA	MOCOS	1.4355	0.00146709	0.0458163
NM_018009.4	mRNA	TAPBPL	1.26624	6.14245e-06	0.00039268
NM_018284.2	mRNA	GBP3	1.88529	4.40069e-25	1.24564e-22
NM_018295.4	mRNA	TMEM140	1.83413	2.19307e-24	6.09268e-22
NM_018323.3	mRNA	PI4K2B	1.24342	5.68038e-12	6.90949e-10
NM_018381.3	mRNA	C19orf66	2.15533	1.5008e-31	5.49148e-29
NM_018438.5	mRNA	FBXO6	2.42216	1.35955e-17	2.62609e-15
NM_018659.2	mRNA	CYTL1	-1.33941	2.23988e-05	0.0013256
NM_018683.3	mRNA	RNF114	1.23435	2.22019e-11	2.53609e-09
NM_018833.2	mRNA	TAP2	2.24612	6.24172e-18	1.24299e-15
NM_018950.2	mRNA	HLA-F	5.17594	2.01791e-13	2.77731e-11
NM_019111.4	mRNA	HLA-DRA	-6.46894	0.000955211	0.0325191
NM_020119.3	mRNA	ZC3HAV1	1.41907	1.8252e-14	2.91294e-12
NM_020190.3	mRNA	OLFML3	1.62544	0.000357723	0.0145304
NM_020904.2	mRNA	PLEKHA4	2.60726	4.53074e-14	6.68559e-12
NM_020949.2	mRNA	SLC7A14	-1.15506	0.000381664	0.0153231
NM_020954.3	mRNA	RNF213	3.12369	2.55189e-39	1.18403e-36
NM_020963.4	mRNA	MOV10	1.64203	3.05684e-19	6.64619e-17
NM_020975.4	mRNA	RET	3.25321	0.00107201	0.0354497
NM_021034.2	mRNA	IFITM3	2.34804	9.62752e-28	2.92768e-25
NM_021035.2	mRNA	ZNFX1	2.0517	4.83114e-22	1.2496e-19
NM_021105.2	mRNA	PLSCR1	2.42342	1.36886e-32	5.17707e-30
NM_021121.3	mRNA	EEF1B2	-1.05131	2.00296e-08	1.79572e-06
NM_021127.2	mRNA	PMAIP1	1.34217	1.41224e-12	1.78538e-10
NM_021170.3	mRNA	HES4	1.80803	5.60654e-12	6.83816e-10
NM_021813.3	mRNA	BACH2	-1.08056	0.000805839	0.0286022
NM_021822.3	mRNA	APOBEC3G	3.54391	2.25066e-09	2.19249e-07
NM_022059.3	mRNA	CXCL16	1.10982	0.000770618	0.0276354
NM_022147.2	mRNA	RTP4	5.73884	3.79984e-46	2.06043e-43
NM_022162.2	mRNA	NOD2	3.37415	1.96073e-05	0.00117816
NM_022168.3	mRNA	IFIH1	4.5428	1.54582e-55	1.07032e-52
NM_022350.4	mRNA	ERAP2	1.10337	3.00195e-09	2.88687e-07
NM_022470.3	mRNA	ZMAT3	-1.024	5.66937e-07	4.43143e-05
NM_022750.3	mRNA	PARP12	1.70872	6.6336e-22	1.69632e-19
NM_022872.2	mRNA	IFI6	6.86477	2.79958e-85	9.69213e-82
NM_022873.2	mRNA	IFI6	6.86517	2.79398e-85	9.69213e-82
NM_024081.5	mRNA	PRRG4	3.34405	2.70865e-10	2.82104e-08
NM_024119.2	mRNA	DHX58	3.56473	5.37617e-39	2.46898e-36
NM_024344.1	mRNA	CAPN3	1.52613	0.00118334	0.0382302
NM_024625.3	mRNA	ZC3HAV1	2.14795	1.83439e-31	6.60469e-29
NM_024913.4	mRNA	CPED1	1.76102	0.000239621	0.0103497
NM_024923.3	mRNA	NUP210	-4.10193	1.46727e-05	0.00089238
NM_024956.3	mRNA	TMEM62	1.50413	6.00571e-15	1.05583e-12
NM_025239.3	mRNA	PDCD1LG2	1.21932	1.43369e-08	1.29308e-06
NM_030641.3	mRNA	APOL6	3.91246	2.56616e-14	3.92567e-12
NM_030644.1	mRNA	APOL3	2.05689	5.23604e-13	6.99268e-11
NM_030882.3	mRNA	APOL2	1.92163	2.09565e-21	5.07079e-19
NM_030930.3	mRNA	UNC93B1	2.52993	5.61819e-21	1.31694e-18
NM_030961.2	mRNA	TRIM56	1.41809	2.72765e-12	3.38184e-10
NM_031212.3	mRNA	SLC25A28	2.41992	1.58238e-30	5.2753e-28
NM_031229.3	mRNA	RBCK1	1.19925	4.2426e-11	4.73803e-09
NM_031458.2	mRNA	PARP9	4.29323	6.36564e-41	3.21901e-38
NM_031845.2	mRNA	MAP2	1.60438	7.80466e-18	1.54739e-15
NM_031847.2	mRNA	MAP2	1.59765	6.17754e-18	1.23567e-15
NM_031917.2	mRNA	ANGPTL6	2.14657	1.78991e-15	3.24826e-13
NM_032043.2	mRNA	BRIP1	1.13202	8.08271e-05	0.00410113
NM_032206.4	mRNA	NLRC5	3.97306	2.063e-21	5.01878e-19
NM_032789.4	mRNA	PARP10	3.63209	1.12508e-51	7.13172e-49
NM_032855.3	mRNA	HSH2D	2.68335	4.43473e-05	0.0024105
NM_033034.2	mRNA	TRIM5	1.08758	1.33317e-08	1.20725e-06
NM_033092.2	mRNA	TRIM5	1.09475	1.07343e-08	9.89977e-07
NM_033093.2	mRNA	TRIM5	1.03946	2.32425e-07	1.91234e-05
NM_033109.4	mRNA	PNPT1	2.33994	4.93992e-29	1.55473e-26
NM_033133.4	mRNA	CNP	1.24708	1.44752e-10	1.54012e-08
NM_033219.2	mRNA	TRIM14	3.1316	1.08928e-11	1.29011e-09
NM_033238.2	mRNA	PML	1.7321	3.4841e-17	6.58846e-15
NM_033239.2	mRNA	PML	1.58249	8.46171e-15	1.41572e-12
NM_033240.2	mRNA	PML	1.56773	4.96003e-15	8.82336e-13
NM_033244.3	mRNA	PML	1.58319	8.13317e-15	1.36583e-12
NM_033246.2	mRNA	PML	1.62899	4.15203e-14	6.18763e-12
NM_033247.2	mRNA	PML	1.66862	5.15789e-15	9.13921e-13
NM_033249.2	mRNA	PML	1.61912	3.86686e-15	6.90603e-13
NM_033250.2	mRNA	PML	1.59604	6.98852e-15	1.19591e-12
NM_033255.4	mRNA	EPSTI1	6.5062	1.53242e-39	7.18416e-37
NM_033292.3	mRNA	CASP1	2.01821	2.8376e-10	2.93584e-08
NM_033293.3	mRNA	CASP1	2.09911	2.34552e-09	2.27505e-07
NM_033294.3	mRNA	CASP1	2.09587	3.83436e-09	3.6484e-07
NM_033295.3	mRNA	CASP1	2.22709	5.83901e-06	0.000374879
NM_033405.3	mRNA	HELZ2	4.13171	3.30658e-79	7.44079e-76
NM_033518.3	mRNA	SLC38A5	1.27883	0.000549749	0.0208266
NM_033629.4	mRNA	TREX1	1.80607	4.47554e-13	6.01272e-11
NM_052886.2	mRNA	MAL2	-2.49103	2.31819e-10	2.43768e-08
NM_052941.4	mRNA	GBP4	4.15571	8.94771e-19	1.89953e-16
NM_052942.3	mRNA	GBP5	5.06734	1.10484e-18	2.32356e-16
NM_058166.4	mRNA	TRIM6	1.71655	1.28434e-08	1.16538e-06
NM_080424.2	mRNA	SP110	3.44516	2.96588e-27	8.83989e-25
NM_080628.2	mRNA	TLDC2	3.8715	3.45366e-66	4.59045e-63
NM_080657.4	mRNA	RSAD2	8.5312	9.35906e-38	4.17043e-35
NM_080682.2	mRNA	VCAM1	2.46633	4.85698e-11	5.39736e-09
NM_080759.5	mRNA	DACH1	-1.22992	1.38218e-06	9.96896e-05
NM_080760.5	mRNA	DACH1	-1.26072	1.48284e-06	0.000106779
NM_133477.2	mRNA	SYNPO2	2.23622	1.70439e-05	0.00102963
NM_138287.3	mRNA	DTX3L	3.617	7.20059e-33	2.74635e-30
NM_138441.2	mRNA	MB21D1	1.10243	0.000234979	0.0101981
NM_138456.3	mRNA	BATF2	5.58749	1.32585e-80	3.51006e-77
NM_139245.3	mRNA	PPM1L	-1.15987	0.000115696	0.00569694
NM_139266.2	mRNA	STAT1	3.01383	6.5539e-46	3.51149e-43
NM_144643.3	mRNA	SCLT1	1.30007	8.31842e-05	0.00421123
NM_144646.3	mRNA	JCHAIN	-6.43891	3.81843e-05	0.00212952
NM_144665.3	mRNA	SESN3	-1.23144	0.000108454	0.00536975
NM_144975.3	mRNA	SLFN5	1.65972	4.87068e-20	1.11842e-17
NM_145279.4	mRNA	MOB3C	1.18924	1.89357e-09	1.85265e-07
NM_145298.5	mRNA	APOBEC3F	1.41075	4.48432e-07	3.55319e-05
NM_145343.2	mRNA	APOL1	3.28387	1.41174e-30	4.74155e-28
NM_145637.2	mRNA	APOL2	1.92129	1.9498e-21	4.79524e-19
NM_145639.1	mRNA	APOL3	2.05294	6.33082e-13	8.33114e-11
NM_145640.2	mRNA	APOL3	2.05298	6.14189e-13	8.10622e-11
NM_145641.2	mRNA	APOL3	2.05515	6.41595e-13	8.39867e-11
NM_145642.2	mRNA	APOL3	2.05515	6.41946e-13	8.39867e-11
NM_148919.3	mRNA	PSMB8	2.30627	3.36164e-15	6.02764e-13
NM_152240.2	mRNA	ZMAT3	-1.02535	5.62045e-07	4.40686e-05
NM_152426.3	mRNA	APOBEC3D	1.47176	0.000331306	0.0136545
NM_152468.4	mRNA	TMC8	-3.769	0.000257796	0.0110156
NM_152542.4	mRNA	PPM1K	2.49393	2.84265e-43	1.48763e-40
NM_152574.2	mRNA	TTC39B	1.08649	0.00104558	0.0348015
NM_152649.3	mRNA	MLKL	2.26674	1.16803e-25	3.36977e-23
NM_152703.3	mRNA	SAMD9L	3.77152	1.35309e-60	1.32385e-57
NM_152716.2	mRNA	PATL1	1.31509	2.34225e-10	2.45723e-08
NM_152793.2	mRNA	MTURN	-1.12075	1.73401e-07	1.46411e-05
NM_152899.1	mRNA	IL4I1	2.32574	5.43092e-08	4.72774e-06
NM_153029.3	mRNA	N4BP1	1.06584	1.23945e-08	1.12693e-06
NM_153341.3	mRNA	RNF19B	1.18538	9.55862e-09	8.85176e-07
NM_153487.3	mRNA	MDGA1	1.61385	0.000542887	0.020584
NM_170587.3	mRNA	RGS20	1.23652	0.00026772	0.0113885
NM_172200.2	mRNA	IL15RA	1.75576	8.35153e-12	9.97e-10
NM_172208.2	mRNA	TAPBP	1.15024	2.71411e-10	2.82104e-08
NM_172209.2	mRNA	TAPBP	1.30272	2.28713e-12	2.86726e-10
NM_172210.2	mRNA	CSF1	1.31679	3.79346e-07	3.03248e-05
NM_172211.3	mRNA	CSF1	1.32825	2.03894e-10	2.16426e-08
NM_172212.2	mRNA	CSF1	1.32366	1.30872e-07	1.11132e-05
NM_172217.3	mRNA	IL16	-3.06635	0.000781099	0.0278946
NM_172219.2	mRNA	CSF3	2.01204	0.000924437	0.0317597
NM_172220.2	mRNA	CSF3	2.03046	0.000880795	0.0305872
NM_172374.2	mRNA	IL4I1	1.42068	2.43001e-06	0.000166795
NM_173044.2	mRNA	IL18BP	1.28839	0.000564328	0.0213251
NM_173087.1	mRNA	CAPN3	1.53717	0.00103376	0.0345024
NM_173487.2	mRNA	C4orf33	1.52691	7.46316e-09	6.93981e-07
NM_173620.2	mRNA	HEXDC	1.37364	3.01319e-09	2.8915e-07
NM_174983.4	mRNA	MFSD12	1.2494	6.12156e-06	0.000392219
NM_175055.2	mRNA	HIST3H2BB	1.17417	1.07647e-06	7.90338e-05
NM_176783.2	mRNA	PSME1	1.31232	3.89871e-11	4.3757e-09
NM_177937.2	mRNA	GOLM1	1.26565	2.50359e-12	3.11262e-10
NM_181782.4	mRNA	NCOA7	1.6251	1.41191e-12	1.78538e-10
NM_181864.2	mRNA	ACOT7	1.29177	3.59434e-05	0.00202209
NM_181865.2	mRNA	ACOT7	1.31041	4.34644e-05	0.00236536
NM_181866.2	mRNA	ACOT7	1.34243	2.79391e-05	0.00160591
NM_182526.2	mRNA	TMEM229B	2.70429	0.000446826	0.017381
NM_182705.2	mRNA	RFLNB	-1.15345	6.05365e-10	6.08149e-08
NM_182760.3	mRNA	SUMF1	-1.25537	3.26439e-06	0.000217978
NM_182962.2	mRNA	BIRC3	1.86072	2.43874e-07	1.99923e-05
NM_182985.4	mRNA	TRIM69	1.93009	4.79752e-05	0.00257044
NM_183061.2	mRNA	SLC9C1	2.44116	0.00079246	0.0282143
NM_194284.2	mRNA	CLDN23	2.47241	2.24219e-06	0.00015556
NM_194441.2	mRNA	BTN3A1	2.0069	1.30033e-11	1.51613e-09
NM_197974.2	mRNA	BTN3A3	1.86828	3.12821e-17	5.94043e-15
NM_198141.2	mRNA	GANC	1.00985	1.10608e-05	0.000683763
NM_198183.2	mRNA	UBE2L6	3.58334	4.43728e-35	1.8664e-32
NM_198213.2	mRNA	OASL	7.69136	3.8579e-106	2.48041e-102
NM_198332.1	mRNA	STAT2	2.72747	3.45724e-47	1.99483e-44
NM_198557.2	mRNA	RBM43	1.72813	2.38185e-09	2.30324e-07
NM_198576.3	mRNA	AGRN	1.37887	3.43426e-10	3.52882e-08
NM_198793.2	mRNA	CD47	1.08668	2.5767e-06	0.000175442
NM_198965.1	mRNA	PTHLH	2.31164	0.000852328	0.0298986
NM_198995.2	mRNA	CCDC178	-2.60779	1.49729e-06	0.000107552
NM_199139.2	mRNA	XAF1	4.25248	7.44563e-43	3.8517e-40
NM_201403.2	mRNA	MOB3C	1.17336	2.09821e-09	2.04842e-07
NM_201442.3	mRNA	C1S	4.53839	1.16071e-09	1.14559e-07
NM_203379.1	mRNA	ACSL5	2.19167	3.22646e-08	2.84168e-06
NM_203380.1	mRNA	ACSL5	2.19138	4.02433e-08	3.52372e-06
NM_207315.3	mRNA	CMPK2	8.04995	3.52028e-169	1.58434e-164
